# Supplementary material for: Projected Uptake of New Antiretroviral (ARV) Medicines in Adults in Low- and Middle-Income Countries: A Forecast Analysis 2015-2025
Source: PLoS One. 2016 Oct 13;11(10):e0164619. doi: 10.1371/journal.pone.0164619 (PMC5063297; doi:10.1371/journal.pone.0164619)
Supplement: S1 FC — (XLSX) [file pone.0164619.s001.xlsx]

## Sheet: Assumptions
GENERAL ASSUMPTIONS
	Y0	Y1	Y2	Y3	Y4	Y5	Y6	Y7	Y8	Y9	Y10
Conservative (25%)	0	0.01	0.02	0.03	0.0425	0.0525	0.0625	0.0725	0.0825	0.095	0.105
Conservative (50%)	0	0.02	0.04	0.06	0.085	0.105	0.125	0.145	0.165	0.19	0.21
Conservative (75%)	0	0.03	0.06	0.09	0.1275	0.1575	0.1875	0.2175	0.2475	0.285	0.315
Baseline (100%)	0	0.04	0.08	0.12	0.17	0.21	0.25	0.29	0.33	0.38	0.42
Aggressive (125%)	0	0.05	0.1	0.15	0.2125	0.2625	0.3125	0.3625	0.4125	0.475	0.525
Aggressive (150%)	0	0.06	0.12	0.18	0.255	0.315	0.375	0.435	0.495	0.57	0.63
Aggressive (200%)	0	0.08	0.16	0.24	0.34	0.42	0.5	0.58	0.66	0.76	0.84

## Sheet: Epi
Epidemiology
	2015	2016	2017	2018	2019	2020	2021	2022	2023	2024	2025
1st ADU	1.39555e+07	1.5715e+07	1.73607e+07	1.88561e+07	2.02171e+07	2.13455e+07	2.38032e+07	2.39605e+07	2.40995e+07	2.42322e+07	2.43571e+07
2nd ADU	586131	952332	1.37496e+06	1.84413e+06	2.35327e+06	2.88165e+06	3.26104e+06	3.33051e+06	3.39803e+06	3.4652e+06	3.53177e+06
3rd ADU	25696.8	61434.2	118264	199906	310006	449737	517685	537678	557767	578208	598956

## Sheet: % Use
MAIN COMPONENT ADULT
1st line ADU
	2015	2016	2017	2018	2019	2020	2021	2022	2023	2024	2025
NVP	0.26	0.18	0.1	0.06	0.02
EFV	0.73	0.81	0.87	0.89	0.82	0.7775	0.7275	0.615	0.555	0.495	0.42
DTG		0	0.02	0.04	0.15	0.2125	0.2625	0.375	0.435	0.495	0.57
Others	0.01	0.01	0.01	0.01	0.01	0.01	0.01	0.01	0.01	0.01	0.01
2nd line ADU
	2015	2016	2017	2018	2019	2020	2021	2022	2023	2024	2025
LPV/r	0.72	0.63	0.54	0.495	0.4725	0.4625	0.4425	0.4125	0.37	0.3175	0.255
ATV/b	0.26	0.35	0.44	0.485	0.5075	0.5075	0.5175	0.5375	0.5675	0.61	0.6625
DRV/b					0	0.01	0.02	0.03	0.0425	0.0525	0.0625
Others	0.02	0.02	0.02	0.02	0.02	0.02	0.02	0.02	0.02	0.02	0.02
3rd line ADU
	2015	2016	2017	2018	2019	2020	2021	2022	2023	2024	2025
RAL	0.7	0.7	0.65	0.6	0.55	0.4875	0.45	0.41	0.37	0.32	0.28
DTG		0	0.05	0.1	0.15	0.2125	0.25	0.29	0.33	0.38	0.42
Others	0.3	0.3	0.3	0.3	0.3	0.3	0.3	0.3	0.3	0.3	0.3
BACKBONES ADULT
BACKBONES 1st LINE
NVP	2015	2016	2017	2018	2019	2020	2021	2022	2023	2024	2025
AZT/3TC	0.59	0.59	0.59	0.59	0.59	0.59	0.59	0.59	0.59	0.59	0.59
TDF/XTC	0.39	0.39	0.39	0.39	0.39	0.39	0.39	0.39	0.39	0.39	0.39
Others	0.02	0.02	0.02	0.02	0.02	0.02	0.02	0.02	0.02	0.02	0.02
EFV	2015	2016	2017	2018	2019	2020	2021	2022	2023	2024	2025
AZT/3TC	0.0845614	0.0618421	0.0391228	0.0391228	0.0391228	0.0391228	0.0391228	0.0391228	0.0195614	0.0195614	0.0195614
TDF/XTC	0.895439	0.918158	0.940877	0.940877	0.940877	0.920877	0.900877	0.840877	0.810439	0.705439	0.645439
TAF/XTC					0	0.02	0.04	0.1	0.15	0.255	0.315
Others	0.02	0.02	0.02	0.02	0.02	0.02	0.02	0.02	0.02	0.02	0.02
DTG	2015	2016	2017	2018	2019	2020	2021	2022	2023	2024	2025
TDF/XTC		0.95	0.95	0.95	0.98	0.96	0.94	0.88	0.83	0.725	0.665
TAF/XTC					0	0.02	0.04	0.1	0.15	0.255	0.315
Others		0.05	0.05	0.05	0.02	0.02	0.02	0.02	0.02	0.02	0.02
BACKBONES 2nd LINE
LPV/r	2015	2016	2017	2018	2019	2020	2021	2022	2023	2024	2025
AZT/3TC	0.32	0.41	0.44	0.46	0.52	0.61	0.7575	0.7075	0.6675	0.6375	0.6
TDF/XTC	0.62	0.56	0.5	0.45	0.36	0.2125	0.015	0.015
TAF/XTC					0	0.02	0.04	0.06	0.085	0.085	0.085
DTG		0	0.03	0.06	0.09	0.1275	0.1575	0.1875	0.2175	0.2475	0.285
Others	0.06	0.03	0.03	0.03	0.03	0.03	0.03	0.03	0.03	0.03	0.03
ATV/r	2015	2016	2017	2018	2019	2020	2021	2022	2023	2024	2025
AZT/3TC	0.32	0.41	0.44	0.46	0.52	0.61	0.7575	0.7075	0.6675	0.6375	0.6
TDF/XTC	0.62	0.56	0.5	0.45	0.36	0.2125	0.015	0.015
TAF/XTC					0	0.02	0.04	0.06	0.085	0.085	0.085
DTG		0	0.03	0.06	0.09	0.1275	0.1575	0.1875	0.2175	0.2475	0.285
Others	0.06	0.03	0.03	0.03	0.03	0.03	0.03	0.03	0.03	0.03	0.03
DRV/r	2015	2016	2017	2018	2019	2020	2021	2022	2023	2024	2025
AZT/3TC		0.3	0.3	0.3	0.3	0.3	0.3	0.3	0.3	0.3	0.3
DTG		0.65	0.65	0.65	0.65	0.65	0.65	0.65	0.65	0.65	0.65
Others		0.05	0.05	0.05	0.05	0.05	0.05	0.05	0.05	0.05	0.05
DTG	2015	2016	2017	2018	2019	2020	2021	2022	2023	2024	2025
TDF/XTC		0.95	0.95	0.95	0.98	0.96	0.94	0.88	0.83	0.725	0.665
TAF/XTC					0	0.02	0.04	0.1	0.15	0.255	0.315
Others		0.05	0.05	0.05	0.02	0.02	0.02	0.02	0.02	0.02	0.02
BACKBONES 3rd LINE
	2015	2016	2017	2018	2019	2020	2021	2022	2023	2024	2025
DRV/r	0.7	0.7	0.7	0.7	0.7	0.7	0.7	0.7	0.7	0.7	0.7
DRV/ETV	0.1	0.1	0.1	0.1	0.1	0.1	0.1	0.1	0.1	0.1	0.1
Others	0.2	0.2	0.2	0.2	0.2	0.2	0.2	0.2	0.2	0.2	0.2
1st line backbone - adults
	2015	2016	2017	2018	2019	2020	2021	2022	2023	2024	2025
AZT	0.21513	0.156292	0.0930368	0.0702193	0.0438807	0.030418	0.0284618	0.0240605	0.0108566	0.00968289	0.00821579
TDF	0.75507	0.813908	0.876563	0.898781	0.926319	0.919982	0.902138	0.847139	0.810843	0.708067	0.650134
TAF	0	0	0	0	0	0.0198	0.0396	0.099	0.1485	0.25245	0.31185
Others	0.0298	0.0298	0.0304	0.031	0.0298	0.0298	0.0298	0.0298	0.0298	0.0298	0.0298
2nd line backbone - adults
	2015	2016	2017	2018	2019	2020	2021	2022	2023	2024	2025
AZT	0.3136	0.4018	0.4312	0.4508	0.5096	0.5947	0.7332	0.681125	0.638531	0.607031	0.56925
TDF	0.6076	0.5488	0.49	0.441	0.3528	0.206125	0.0144	0.01425	0	0	0
TAF	0	0	0	0	0	0.0194	0.0384	0.057	0.0796875	0.0788375	0.0779875
DTG	0	0	0.0294	0.0588	0.0882	0.130175	0.1642	0.197625	0.231531	0.263681	0.302113
Others	0.0788	0.0494	0.0494	0.0494	0.0494	0.0496	0.0498	0.05	0.05025	0.05045	0.05065

## Sheet: Number PLHIV
Total number of PLHIV on treatment
	2015	2016	2017	2018	2019	2020	2021	2022	2023	2024	2025
TAF	0	0	0	0	0	0.478545	1.06783	2.56193	3.84955	6.39061	7.87118
TDF	10.8935	13.3132	15.5616	17.0442	19.5578	20.2315	21.5207	20.3454	19.5409	17.158	15.8354
AZT	3.18605	2.83878	2.20806	2.15539	2.08637	2.363	3.06847	2.845	2.43138	2.33813	2.21057
NVP	3.55586	2.77213	1.70134	1.10874	0.396256	0	0	0	0	0	0
EFV	9.98376	12.4746	14.8017	16.4463	16.2465	16.2642	16.9705	14.441	13.1077	11.755	10.0254
LPV	0.396693	0.58197	0.720206	0.885457	1.07856	1.29278	1.39972	1.33262	1.21955	1.0672	0.873584
ATV	0.14325	0.323317	0.586834	0.867569	1.15846	1.41856	1.63696	1.73644	1.87053	2.05036	2.26961
DRV	0.0125914	0.0301028	0.0579492	0.0979541	0.151903	0.247747	0.315625	0.358382	0.410501	0.456149	0.503187
DTG	0	0	0.0445632	0.122428	3.21203	4.88722	6.74943	9.57283	11.1892	12.8226	14.8489
RAL	0.0125914	0.0301028	0.0538099	0.0839607	0.119352	0.153473	0.163071	0.154314	0.144462	0.129519	0.117395
